# Supplementary material for: Investigation of emission behaviour of perovskite nanocrystals using nano to microspheres of TiO2
Source: Royal Society of Chemistry journal article supplement (doi:10.1039/d1nj05049d), 2021-11-23
Supplement: d1nj05049d1.pdf [file d1nj05049d1.pdf]

## Supporting Information

# Investigation of Emission Behaviour of Perovskite Nanocrystals into TiO<sub>2</sub> Nano to Microsphere

Abha Jha<sup>a</sup>, Hari Shankar<sup>a</sup> and Prasenjit Kar<sup>a\*</sup>

<sup>a</sup>Department of Chemistry, Indian Institute of Technology Roorkee, Haridwar, Uttarakhand-247667, India.

Corresponding Email: kar.prasen@gmail.com, prasenjit.kar@cy.iitr.ac.in.

## Table Of Content

**Figure S1.** The PL emission spectra of PNC/m-TiO<sub>2</sub> with increment in loading amount of TiO<sub>2</sub> solution.

**Figure S2.** DRS of prepared anatase TiO<sub>2</sub> microsphere with a bandgap of 3.2 eV by using an integrated sphere.

**Figure S3.** DRS of prepared TiO<sub>2</sub> nanoparticle with a bandgap of 3.6 eV by using an integrated sphere.

**Figure S4.** FTIR spectra of PNC-Tm, PNC and PNC-Tn shows the presence of functional group corresponding to the ligands. Whereas, PNC-Tm and PNC-Tn, show additional stretching vibrational frequency at 604 cm<sup>-1</sup> correspond to Ti-O-Ti indicating the titanium network present around the perovskite nanocrystals.

**Table S1** Details of IR peak corresponding to PNC-Tm, PNC and PNC-Tn shows the presence of functional group corresponding to ligands.

**Figure S5.** SEM images of PNC shows the cubic morphology of perovskite nanocrystals at a scale bar of 200 nm.

**Figure S6.** TEM images of PNC shows the cubic morphology of perovskite nanocrystals at a scale bar of 50 nm.

**Figure S7.** Magnified TEM images of (a) m-TiO<sub>2</sub> (b) PNC-Tm depicted the pores are densely interconnected as microcrystalline spheres at a scale bar of 200 nm.

**Figure S8.** Shows the EDX and composition table of PNC-Tm with 1:3 of Pb and Br of MAPbBr<sub>3</sub> in pores of TiO<sub>2</sub> microsphere indicating the capping ligand don't affect the stoichiometry ratio of MAPbBr<sub>3</sub>.

**Figure S9.** SEM images of TiO<sub>2</sub> microsphere at a scale bar of 200 nm.

**Figure S10.** TEM images of TiO<sub>2</sub> microsphere at a scale bar of 200 nm.

**Figure S11.** AFM image of TiO<sub>2</sub> microspheres with a Root Mean Square (RMS) value of 66.79 nm over an area of 25 μm<sup>2</sup>.

**Figure S12.** (a) and (b) Fluorescence image of  $\text{TiO}_2$  microspheres encapsulated with  $\text{MAPbBr}_3$  Perovskite shows microsphere are fluorescence. (c) images of PNC and PNC-Tm in day light and under 365 nm UV light.

**Figure S13.** Thermal stability test of PNC at different temperature.

**Figure S14.** Thermogravimetric Analysis (TGA) of encapsulated  $\text{TiO}_2$  microspheres with perovskite nanocrystals (PNC-Tm) indicate the weight loss of 25.52% could be attributed to the decomposition of perovskite nanocrystal from the encapsulated  $\text{TiO}_2$  microspheres. This also suggests the loading of 25.52% PNC into m- $\text{TiO}_2$ .

**Figure S15.** Shows the day stability test of PNC indicating the degradation of PNC with shifting of photoluminescence intensity towards higher wavelength due to the growth of larger size of nanocrystals.

**Figure S16.** Shows the PL spectra which corresponds to moisture stability test of PNC-Tm with 30  $\mu\text{l}$  of water indicating the 8.2% of the PL performance of perovskite was reduced compare to original after 100min storage.

**Figure S17.** Shows the PL spectra which corresponds to moisture stability test of PNC with 30  $\mu\text{l}$  of water indicating the 31% of the PL performance of perovskite was reduced compare to original after 100min storage.

**Figure S18.** Absorption spectra of PNC-Tn in the (a) presence of oxygen and (b) in nitrogen (inert) atmosphere.

**Figure S19.** Photoluminescence (PL) spectra of  $\text{MAPbBr}_3$  perovskite nanocrystals (PNC) and  $\text{TiO}_2$  microspheres after separating from  $\text{TiO}_2$  microspheres encapsulated with perovskites nanocrystals (T-PNC).

**Table S2.** Calculation of lowest unoccupied molecular orbital (LUMO) and highest occupied molecular orbital (HOMO) value of PNC-Tm, PNC and PNC-Tn.

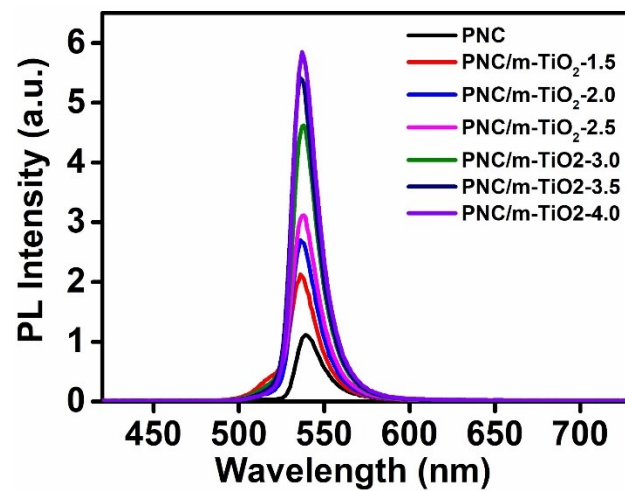

**Figure S1.** The PL emission spectra of PNC/m-TiO<sub>2</sub> with increment in loading amount of TiO<sub>2</sub> solution.

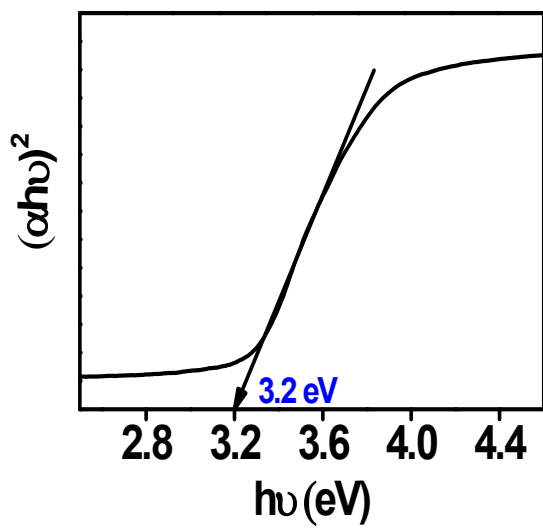

**Figure S2.** DRS of prepared  $\text{TiO}_2$  microspheres with a bandgap of 3.2 eV by using an integrated sphere.

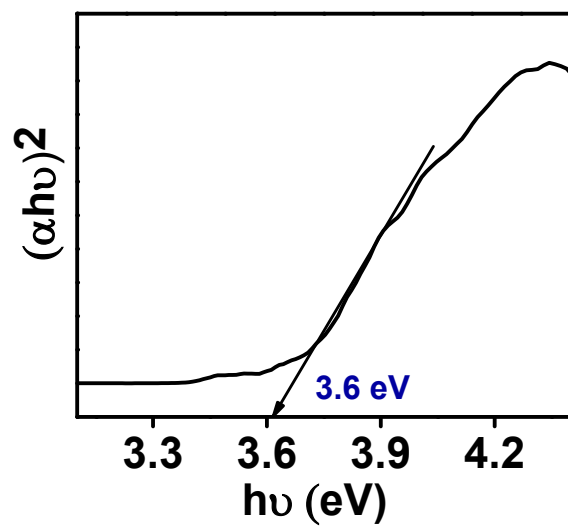

**Figure S3.** DRS of prepared  $\text{TiO}_2$  nanoparticles with a bandgap of 3.6 eV by using an integrated sphere.

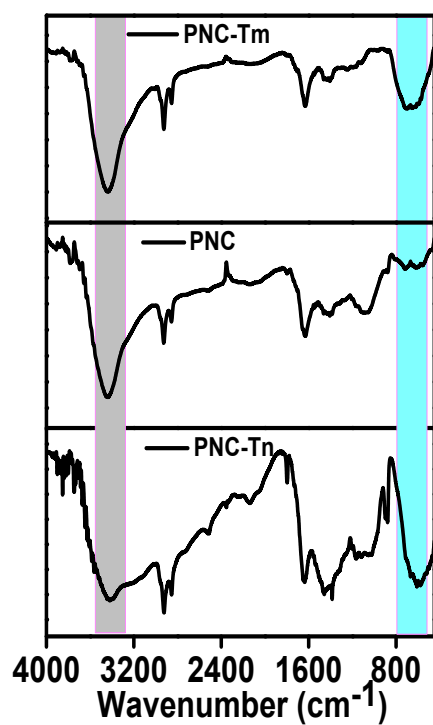

**Figure S4.** FTIR spectra of PNC-Tm, PNC and PNC-Tn shows the presence of functional group corresponding to the ligands. Whereas, PNC-Tm and PNC-Tn, show additional stretching vibrational frequency at 604 cm<sup>-1</sup> correspond to Ti-O-Ti indicating the titanium network present around the perovskite nanocrystals.

**Table S1.** Details of IR peak corresponding to PNC-Tm, PNC and PNC-Tn shows the presence of functional group corresponding to ligands.

| <b>S. No</b> | <b>Wavenumber (cm<sup>-1</sup>)</b> | <b>Corresponding functional group</b>                  |
|--------------|-------------------------------------|--------------------------------------------------------|
| <b>1</b>     | 3441                                | Broad peak of -N-H stretching                          |
| <b>2</b>     | 2925                                | Symmetric stretching vibration of CH <sub>2</sub>      |
| <b>3</b>     | 2856                                | Asymmetric stretching vibration of CH <sub>3</sub>     |
| <b>4</b>     | 1631                                | COO <sup>-</sup> modes                                 |
| <b>5</b>     | 1078                                | Out of plane bending mode of -CH                       |
| <b>6</b>     | 604                                 | Asymmetric stretching vibrational frequency of Ti-O-Ti |



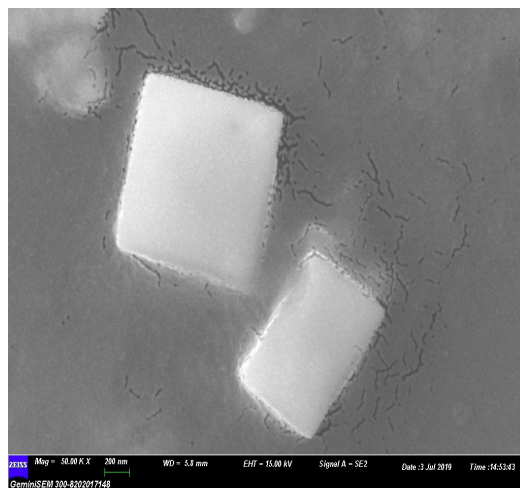

**Figure S5.** SEM images of PNC show the cubic morphology of perovskite nanocrystals at a scale bar of 200 nm.

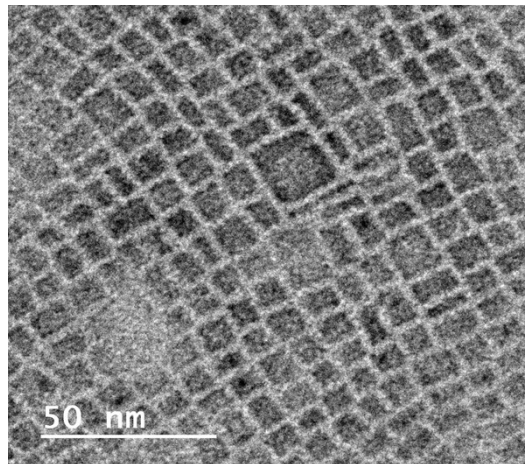

**Figure S6.** TEM images of PNC shows the cubic morphology of perovskite nanocrystals at a scale bar of 50 nm.

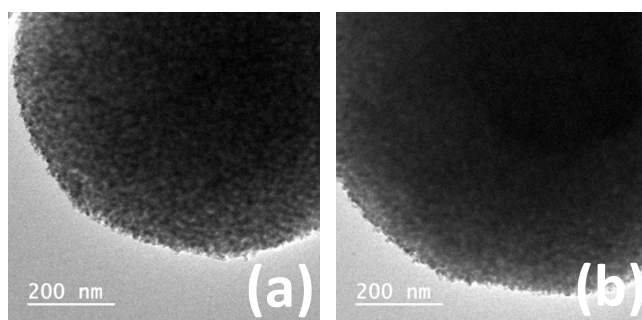

**Figure S7.** Magnified TEM images of (a) m-TiO<sub>2</sub> (b) PNC-Tm depicted the pores are densely interconnected as microcrystalline spheres at a scale bar of 200 nm.

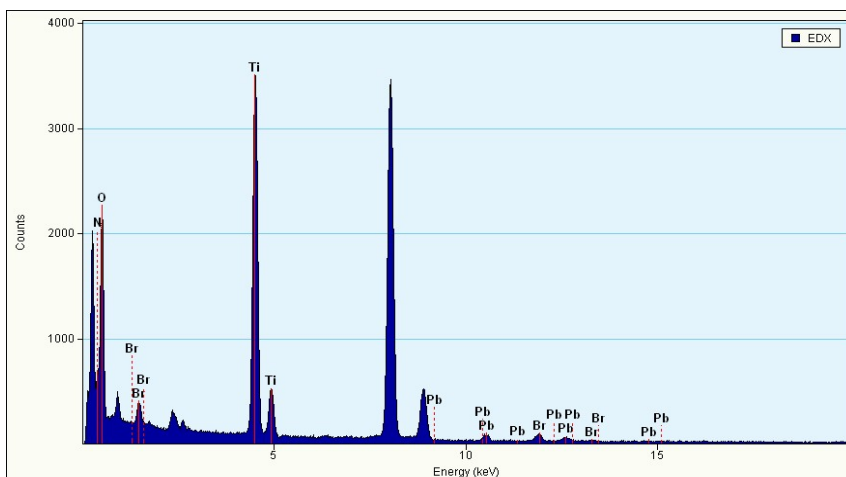

**Figure S8.** Shows the EDX and composition table of PNC-Tm with 1:3 of Pb and Br of MAPbBr<sub>3</sub> in pores of TiO<sub>2</sub> microspheres indicating the capping ligand don't affect the stoichiometry ratio of MAPbBr<sub>3</sub>.

| Element | Weight % | Atomic % | Uncert. % | Detector Correction | K-Factor |
|---------|----------|----------|-----------|---------------------|----------|
| N (K)   | 9.82     | 19.87    | 0.27      | 0.28                | 3.466    |
| O (K)   | 25.37    | 44.95    | 0.29      | 0.51                | 1.889    |
| Ti (K)  | 55.38    | 32.78    | 0.32      | 0.98                | 1.227    |
| Br (K)  | 5.04     | 1.79     | 0.11      | 0.99                | 2.575    |
| Pb (L)  | 4.34     | 0.59     | 0.12      | 0.99                | 4.668    |

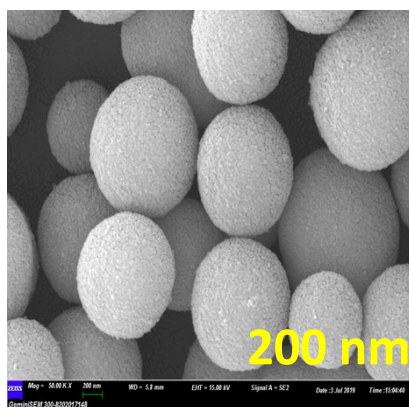

**Figure S9.** Shows the SEM images of TiO<sub>2</sub> microspheres at a scale bar of 200 nm.

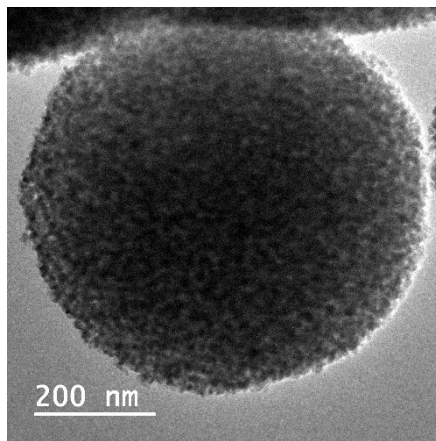

**Figure S10.** Shows the TEM images of TiO<sub>2</sub> microspheres at a scale bar of 200 nm.

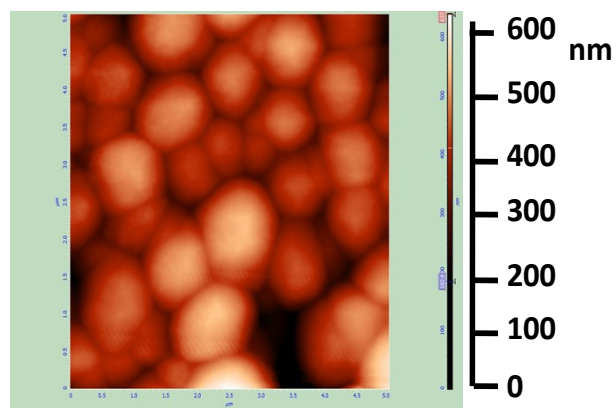

**Figure S11.** AFM image of TiO<sub>2</sub> microspheres with a Root Mean Square (RMS) value of 66.79 nm over an area of 25 μm<sup>2</sup>.

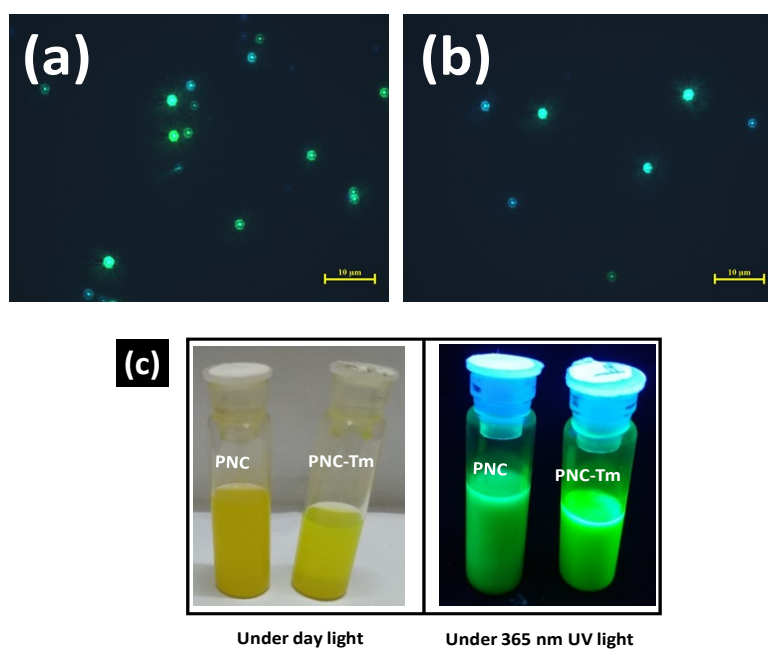

**Figure S12.** (a) and (b) Shows the fluorescent images of PNC-Tm at a scale bar of 10 μm indicating the TiO<sub>2</sub> microspheres is fluorescent after encapsulation with MAPbBr<sub>3</sub> perovskite. (c) images of PNC and PNC-Tm in day light and under 365 nm UV light.



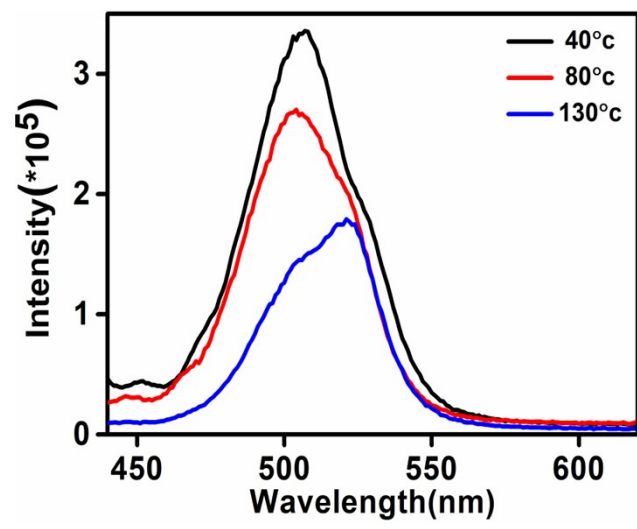

**Figure S13.** Thermal stability test of PNC at different temperature.

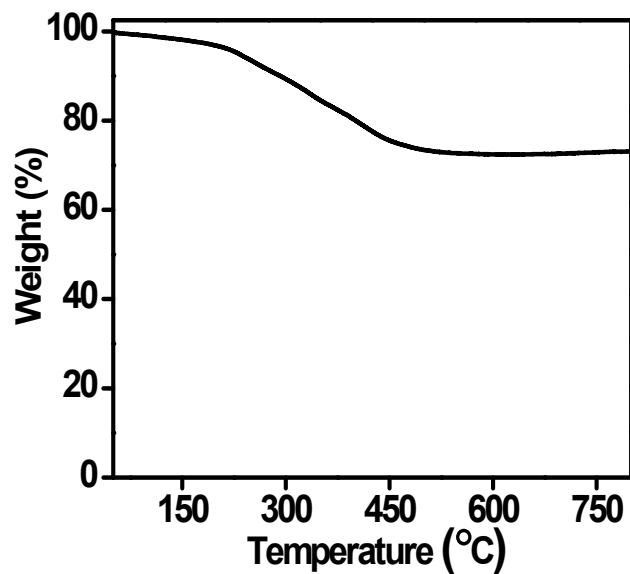

**Figure S14.** Thermogravimetric Analysis (TGA) of encapsulated  $\text{TiO}_2$  microspheres with perovskite nanocrystals (PNC-Tm) indicate the weight loss of 25.52% could be attributed to the decomposition of perovskite nanocrystal from the encapsulated  $\text{TiO}_2$  microspheres. This also suggests the loading of 25.52% PNC into m- $\text{TiO}_2$ .

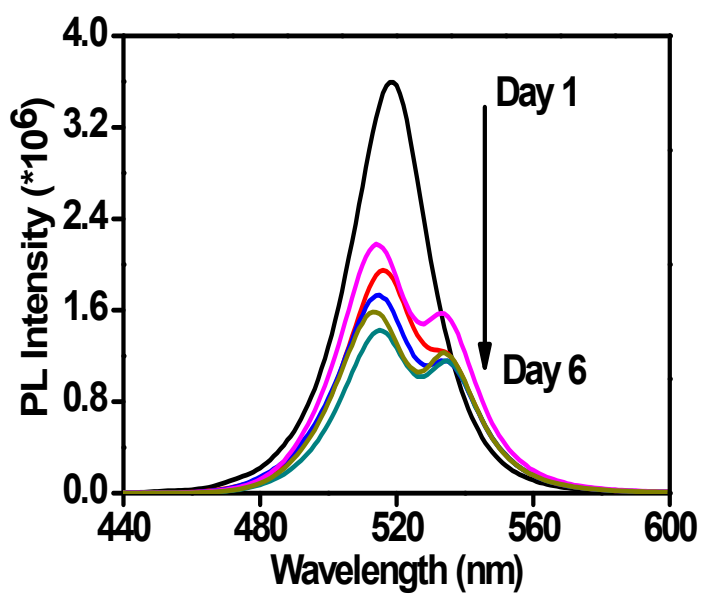

**Figure S15.** Shows the day stability test of PNC in solution form indicating the degradation of PNC with shifting of photoluminescence intensity towards higher wavelength due to the growth of larger size of nanocrystals.

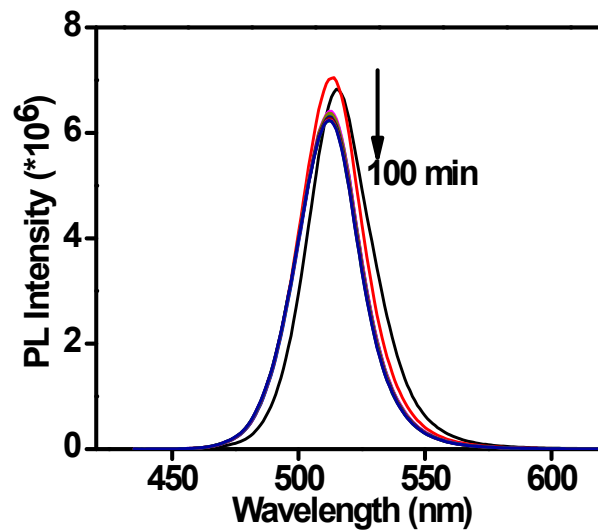

**Figure S16.** Shows the PL spectra which corresponds to moisture stability test of PNC-Tm with 30 $\mu$ l of water indicating the 8.2% of the PL performance of perovskite was reduced compare to original after 100min storage.

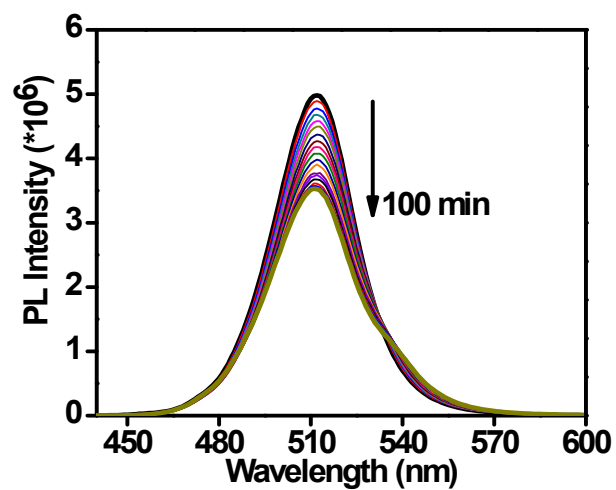

**Figure S17.** Shows the PL spectra which corresponds to moisture stability test of PNC with 30 $\mu$ l of water indicating the 31% of the PL performance of perovskite was reduced compare to original after 100min storage.

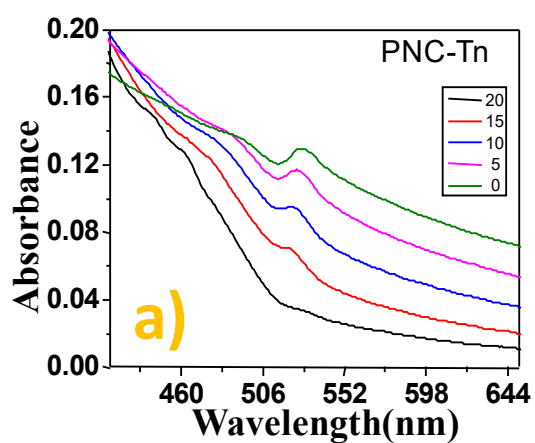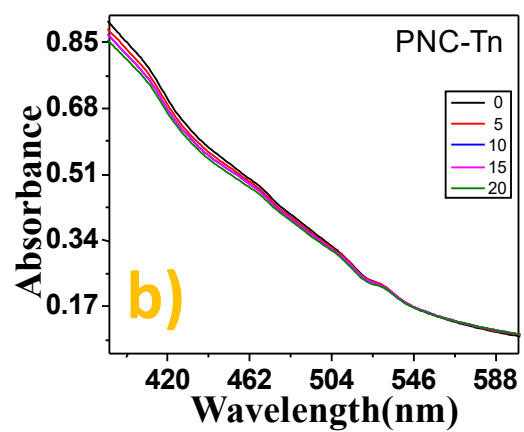

**Figure S18.** Absorption spectra of PNC-Tn in the (a) presence of oxygen and (b) in nitrogen (inert) atmosphere.

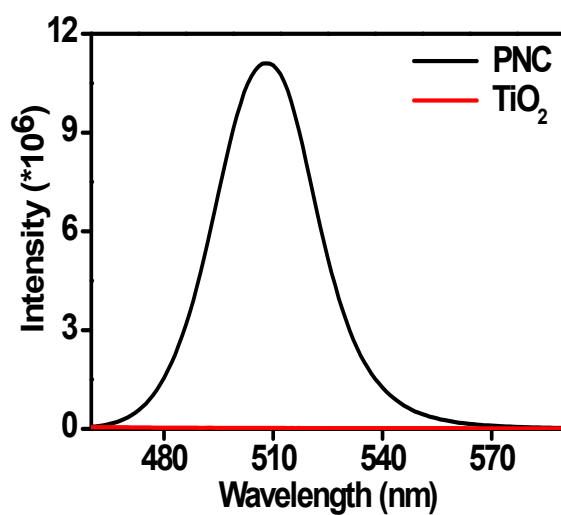

**Figure S19.** Photoluminescence (PL) spectra of MAPbBr<sub>3</sub> perovskite nanocrystals (PNC) and TiO<sub>2</sub> microspheres after separating from TiO<sub>2</sub> microspheres encapsulated with perovskites nanocrystals (T-PNC).

TiO<sub>2</sub> can be separated from the T-PNC at room temperature by sedimentation process and TiO<sub>2</sub> can be reusable after washing with ethanol followed by centrifugation. After that, PL spectra of TiO<sub>2</sub> has been taken, which shows the no fluorescence

| <b>PNC-Tm</b>                                                                                  | <b>PNC</b>                                                                                     | <b>PNC-Tn</b>                                                                                  |
|------------------------------------------------------------------------------------------------|------------------------------------------------------------------------------------------------|------------------------------------------------------------------------------------------------|
| $E_{\text{LUMO}} = -e (E_{\text{red}} + 4.4)$<br>$= - (-0.82 + 4.4)$<br>$= - 3.56 \text{ eV}$  | $E_{\text{LUMO}} = -e (E_{\text{red}} + 4.4)$<br>$= - (-0.83 + 4.4)$<br>$= - 3.57 \text{ eV}$  | $E_{\text{LUMO}} = -e (E_{\text{red}} + 4.4)$<br>$= - (-0.71 + 4.4)$<br>$= - 3.69 \text{ eV}$  |
| $E_{\text{HOMO}} = E_{\text{LUMO}} - E_{\text{g}}$<br>$= -3.56 - 2.26$<br>$= -5.82 \text{ eV}$ | $E_{\text{HOMO}} = E_{\text{LUMO}} - E_{\text{g}}$<br>$= -3.57 - 2.43$<br>$= -6.00 \text{ eV}$ | $E_{\text{HOMO}} = E_{\text{LUMO}} - E_{\text{g}}$<br>$= -3.69 - 2.31$<br>$= -6.00 \text{ eV}$ |

**Table S2.** Calculation of lowest unoccupied molecular orbital (LUMO) and highest occupied molecular orbital (HOMO) value of PNC-Tm, PNC and PNC-Tn.
